# Supplementary material for: Molecular Design of Luminescent Complexes of Eu(III): What Can We Learn from the Ligands
Source: MDPI journal article supplement (doi:10.3390/molecules28104113), 2023-05-16
Supplement: s1 [file s1]

**Table S1.** Crystallographic data for the Eu(L5)2(NO3)3: selected bond lengths and bond angles.

| Selected bond lengths, Å |            | Selected bond angles, ° |           |
|--------------------------|------------|-------------------------|-----------|
| Eu(1)-O(7)               | 2.4954(14) | N(2)-Eu(1)-N(3)         | 97.28(5)  |
| Eu(1)-O(5)               | 2.5007(14) | N(4)-Eu(1)-N(3)         | 63.36(5)  |
| Eu(1)-O(6)               | 2.5095(13) | N(2)-Eu(1)-N(4)         | 158.42(5) |
| Eu(1)-O(3)               | 2.5153(13) | N(2)-Eu(1)-N(3)         | 97.28(5)  |
| Eu(1)-O(10)              | 2.5439(13) | N(2)-Eu(1)-N(1)         | 63.98(5)  |
| Eu(1)-O(9)               | 2.5455(13) | N(4)-Eu(1)-N(1)         | 98.73(5)  |
| Eu(1)-N(2)               | 2.5644(14) | N(3)-Eu(1)-N(1)         | 70.60(5)  |
| Eu(1)-N(4)               | 2.5823(15) |                         |           |
| Eu(1)-N(3)               | 2.5919(15) |                         |           |
| Eu(1)-N(1)               | 2.5919(15) |                         |           |
